# Supplementary material for: The Metabolic Syndrome, Inflammation, and Colorectal Cancer Risk: An Evaluation of Large Panels of Plasma Protein Markers Using Repeated, Prediagnostic Samples
Source: PubMed Central journal article supplement (PMC5381203; doi:10.1155/2017/4803156), 2017-03-22
Supplement: 4803156.f1.pdf [file 4803156.f1.pdf]

# **Supplemental Material**

## **The metabolic syndrome, inflammation and colorectal cancer risk; an evaluation of large panels of plasma protein markers using repeated, pre-diagnostic samples**

Sophia Harlid, Robin Myte, Bethany Van Guelpen

| <b><u>Table of Contents:</u></b>                                               | <b><u>Page</u></b> |
|--------------------------------------------------------------------------------|--------------------|
| Figure S1 (MetS and its components per individual over time)                   | 2                  |
| Figure S2 (Levels of MetS associated proteins (log2) per individual over time) | 3                  |
| Figure S3 (Direction of protein-MetS associations)                             | 4                  |
| Figure S4 (Protein-protein associations of MetS associated proteins)           | 5                  |
| Table S1 (Proteins included in Proseek Multiplex® immunoassay panels)          | 6-10               |

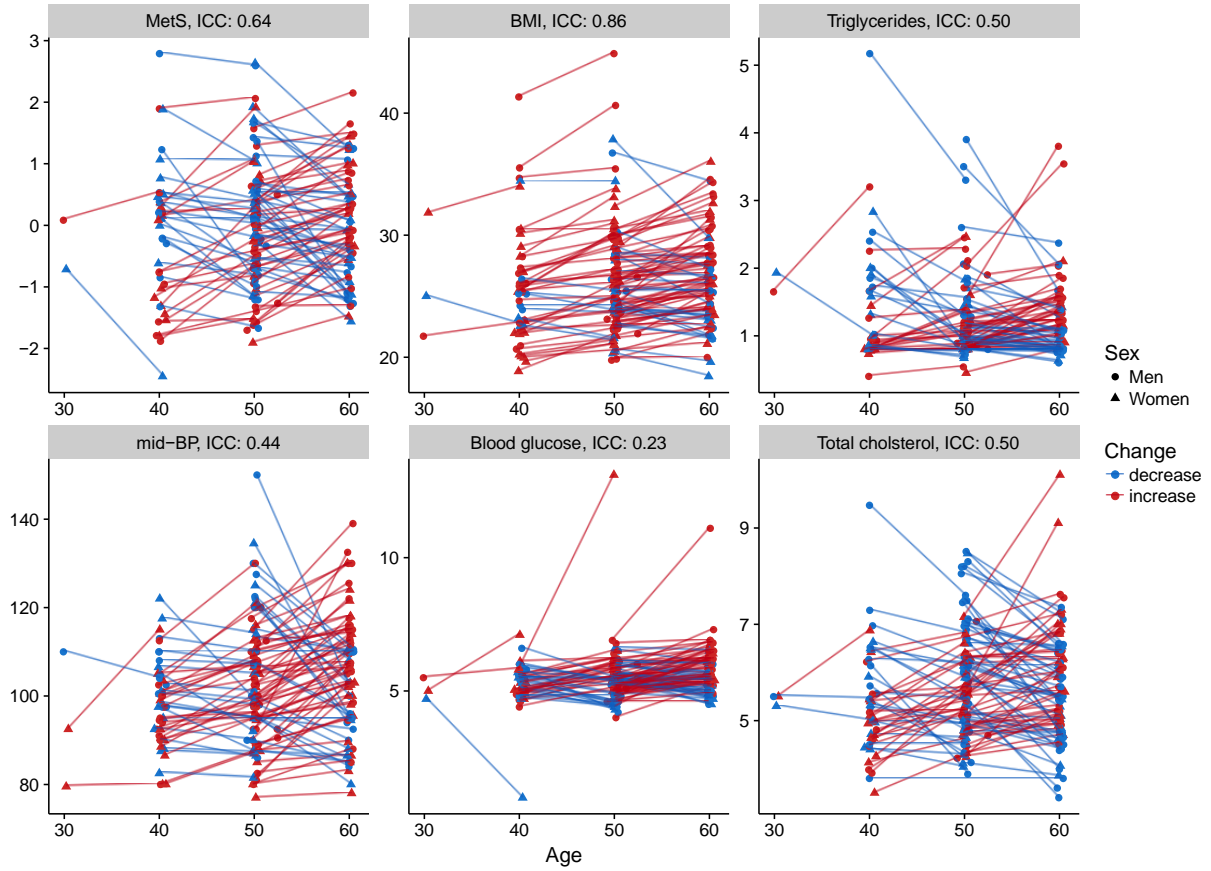

**Figure S1. Metabolic syndrome (MetS) and its components in the study participants over time.** ICC: Intraclass correlation coefficient, i.e., proportion of total variance due to variation between individuals.

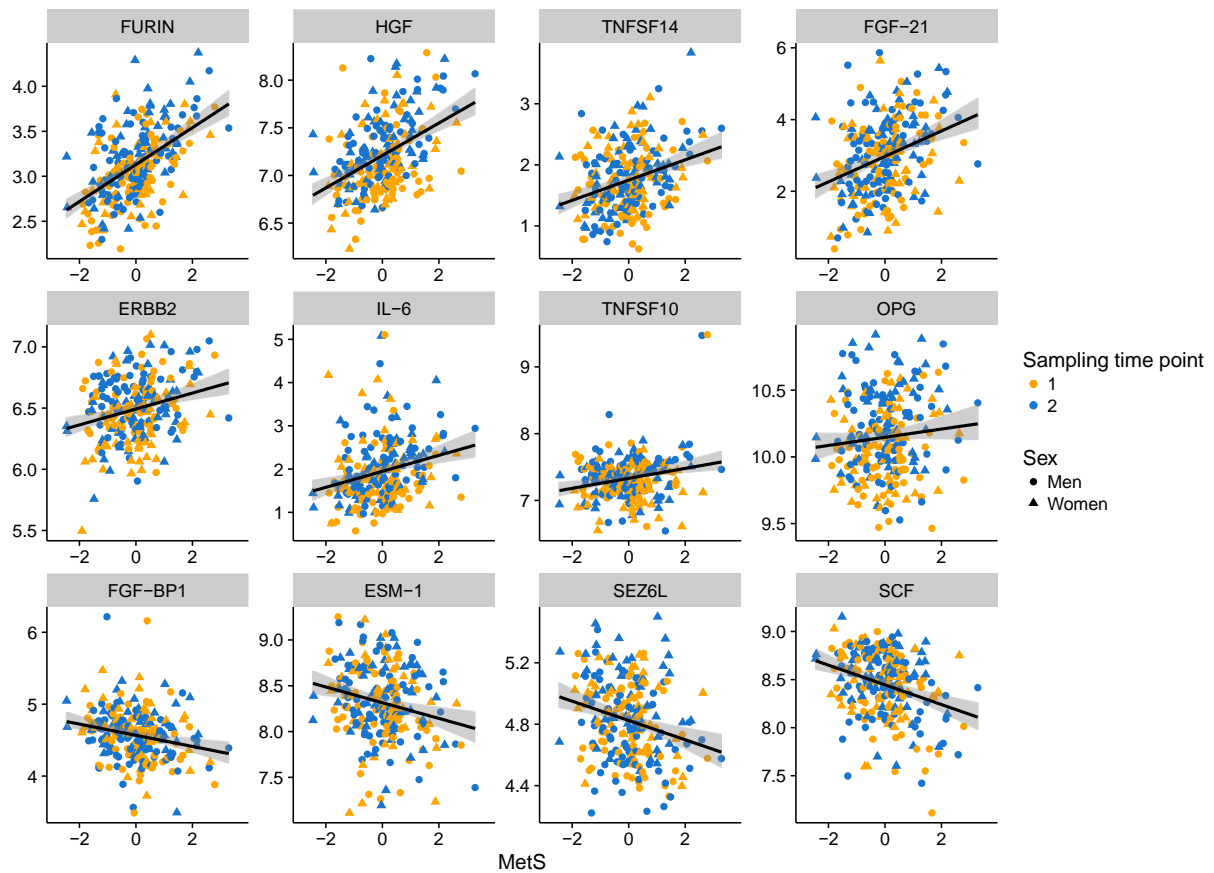

**Figure S2. Direction of protein-metabolic syndrome (MetS) associations.** Protein levels (log<sub>2</sub>) plotted against MetS score, and regression lines with error bounds plotted without random intercepts for simplicity. The proteins are sorted according to size and direction of regression coefficient.

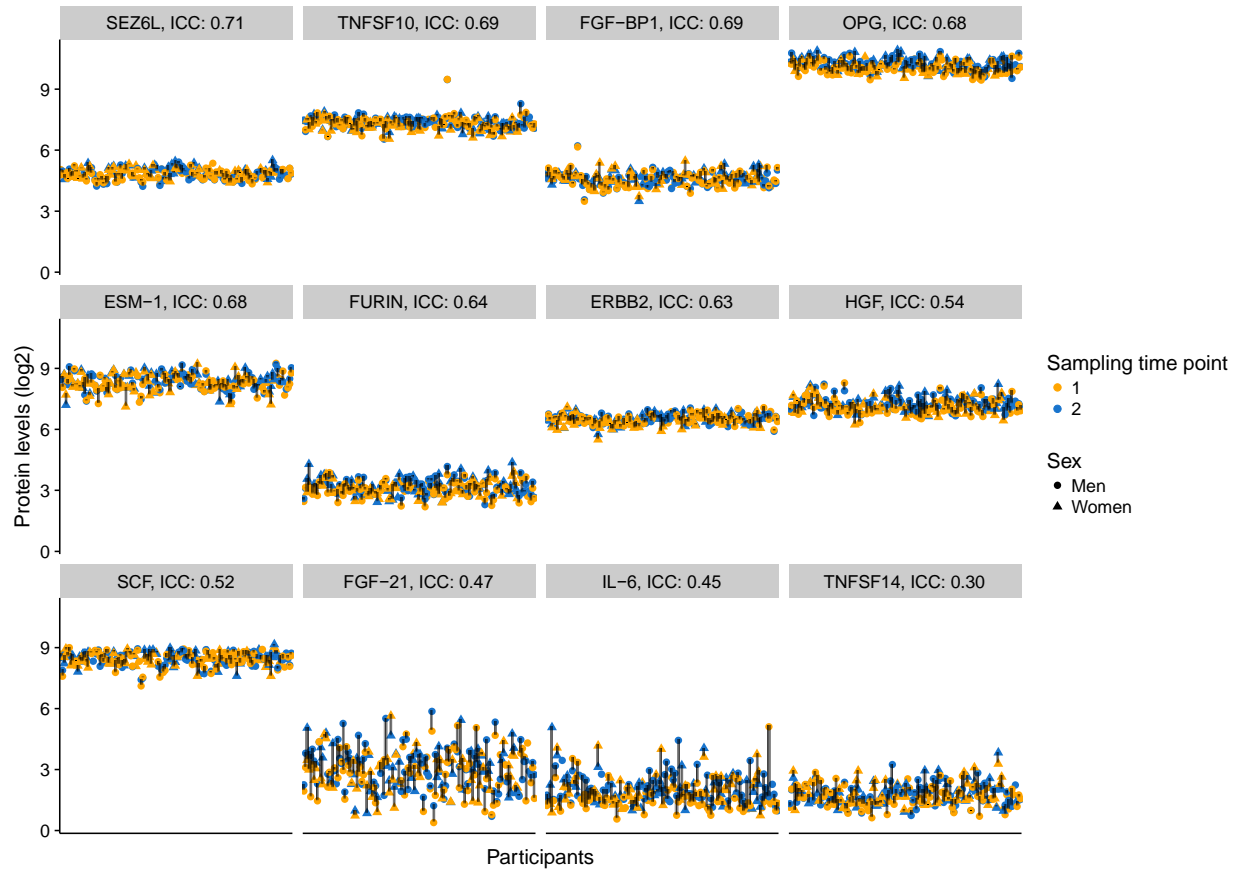

**Figure S3. Levels of metabolic syndrome (MetS) associated proteins (log<sub>2</sub>) per participant by sampling time point.** The proteins are sorted according to ICC (ICC: Intra-class correlation coefficient, i.e., proportion of total variance due to variation between individuals.)

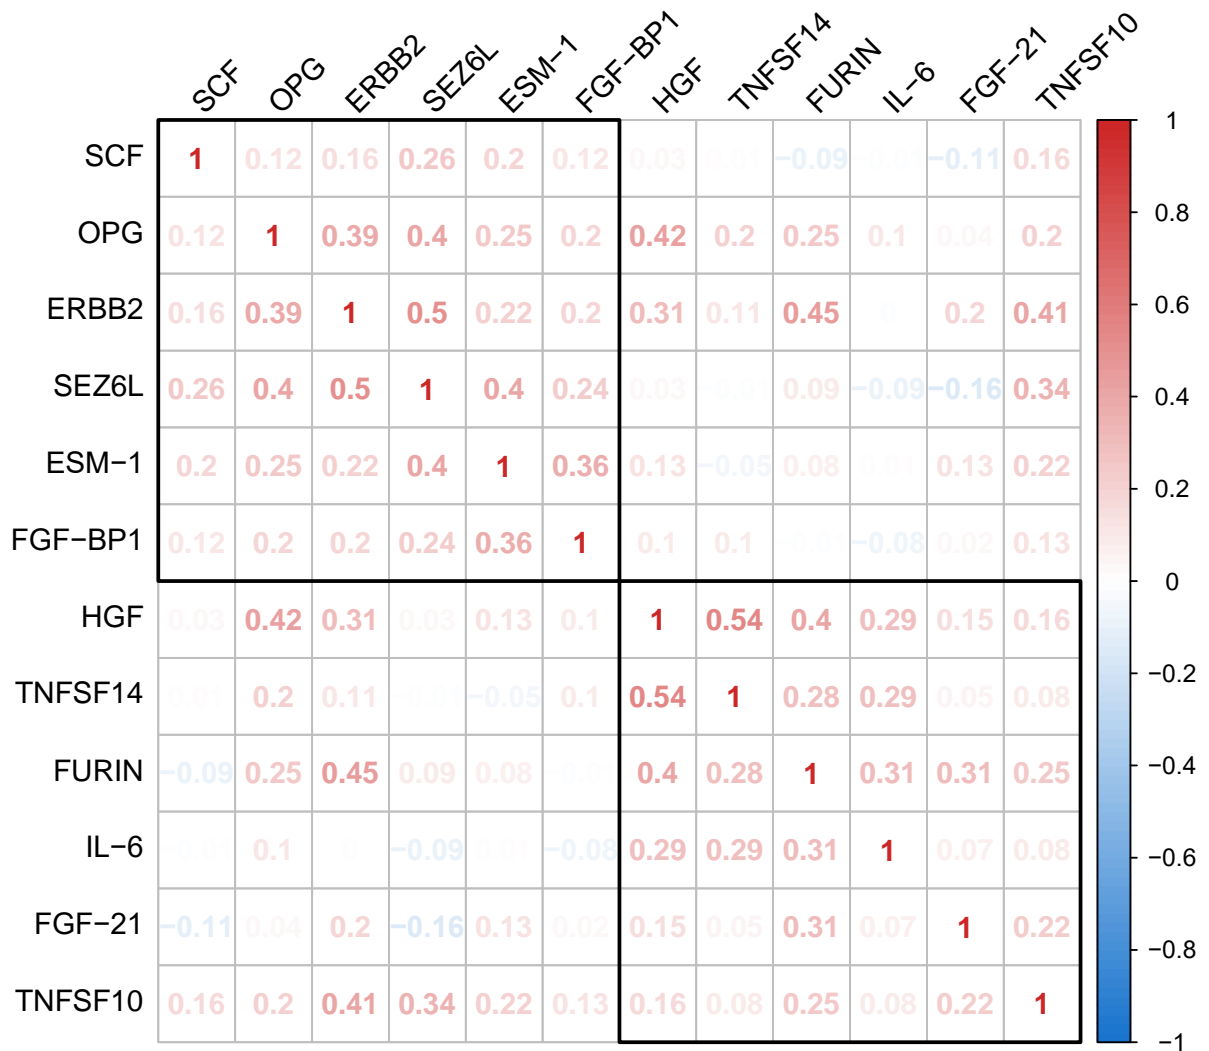

**Figure S4. Partial correlations between metabolic syndrome (MetS) -associated proteins.** Partial correlations were calculated by estimating Spearman’s correlations on the standardized residuals from protein mixed models adjusting for age, sex, MetS, physical activity, smoking and education level. The black squares represent the two major clusters from a hierarchical cluster analysis on the correlations (using Euclidean distance with average linkage).

**Table S1.** Proteins included in Proseek Multiplex® immunoassay panels

| Protein                                                                | UniProt No | Immunoassay panel | Comment                 |
|------------------------------------------------------------------------|------------|-------------------|-------------------------|
| Hepatocyte growth factor (HGF)                                         | P14210     | Both              |                         |
| Interleukin-6 (IL-6)                                                   | P05231     | Both              |                         |
| Stem cell factor (SCF)                                                 | P21583     | Both              | Excluded from one panel |
| TNF-related apoptosis-inducing ligand (TRAIL)                          | P50591     | Both              | Excluded from one panel |
| Transforming growth factor alpha (TGF-alpha)                           | P01135     | Both              |                         |
| Vascular endothelial growth factor A (VEGF-A)                          | P15692     | Both              |                         |
| Adenosine Deaminase (ADA)                                              | P00813     | Inflammation      |                         |
| Artemin (ARTN)                                                         | Q5T4W7     | Inflammation      | Excluded (>50% missing) |
| Axin-1 (AXIN1)                                                         | O15169     | Inflammation      |                         |
| Beta-nerve growth factor (Beta-NGF) P01138                             | P01138     | Inflammation      |                         |
| Brain-derived neurotrophic factor (BDNF)                               | P23560     | Inflammation      |                         |
| Caspase 8 (CASP-8 )                                                    | Q14790     | Inflammation      |                         |
| C-C motif chemokine 19 (CCL19)                                         | Q99731     | Inflammation      |                         |
| C-C motif chemokine 20 (CCL20)                                         | P78556     | Inflammation      |                         |
| C-C motif chemokine 23 (CCL23)                                         | P55773     | Inflammation      |                         |
| C-C motif chemokine 25 (CCL25)                                         | O15444     | Inflammation      |                         |
| C-C motif chemokine 28 (CCL28)                                         | Q9NRJ3     | Inflammation      |                         |
| C-C motif chemokine 4 (CCL4 )                                          | P13236     | Inflammation      |                         |
| CD40L receptor (CD40)                                                  | P25942     | Inflammation      |                         |
| CUB domain-containing protein 1 (CDCP1)                                | Q9H5V8     | Inflammation      |                         |
| C-X-C motif chemokine 1 (CXCL1)                                        | P09341     | Inflammation      |                         |
| C-X-C motif chemokine 10 (CXCL10)                                      | P02778     | Inflammation      |                         |
| C-X-C motif chemokine 11 (CXCL11)                                      | O14625     | Inflammation      |                         |
| C-X-C motif chemokine 5 (CXCL5)                                        | P42830     | Inflammation      |                         |
| C-X-C motif chemokine 6 (CXCL6)                                        | P80162     | Inflammation      |                         |
| C-X-C motif chemokine 9 (CXCL9 )                                       | Q07325     | Inflammation      |                         |
| Cystatin D (CST5)                                                      | P28325     | Inflammation      |                         |
| Delta and Notch-like epidermal growth factor-related recep (DNER)      | Q8NFT8     | Inflammation      |                         |
| Eotaxin-1 (CCL11)                                                      | P51671     | Inflammation      |                         |
| Eukaryotic translation initiation factor 4E-binding protein 1 (4E-BP1) | Q13541     | Inflammation      |                         |
| Fibroblast growth factor 19 (FGF-19)                                   | O95750     | Inflammation      |                         |
| Fibroblast growth factor 21 (FGF-21)                                   | Q9NSA1     | Inflammation      |                         |
| Fibroblast growth factor 23 (FGF-23)                                   | Q9GZV9     | Inflammation      |                         |
| Fibroblast growth factor 5 (FGF-5)                                     | Q8NF90     | Inflammation      |                         |
| Fms-related tyrosine kinase 3 ligand (Flt3L)                           | P49771     | Inflammation      |                         |
| Fractalkine (CX3CL1 )                                                  | P78423     | Inflammation      |                         |
| Glial cell line-derived neurotrophic factor (hGDNF)                    | P39905     | Inflammation      |                         |

Table continues on next page

Table S1. Cont.

| Protein                                                                       | UniProt No | Immunoassay panel | Comment                 |
|-------------------------------------------------------------------------------|------------|-------------------|-------------------------|
| Interferon gamma (IFN-gamma)                                                  | P01579     | Inflammation      |                         |
| Interleukin-1 alpha (IL-1 alpha)                                              | P01583     | Inflammation      | Excluded (>50% missing) |
| Interleukin-10 (IL-10)                                                        | P22301     | Inflammation      |                         |
| Interleukin-10 receptor subunit alpha (IL-10RA)                               | Q13651     | Inflammation      | Excluded (>50% missing) |
| Interleukin-10 receptor subunit beta (IL-10RB)                                | Q08334     | Inflammation      |                         |
| Interleukin-12 subunit beta (IL-12B)                                          | P29460     | Inflammation      |                         |
| Interleukin-13 (IL-13)                                                        | P35225     | Inflammation      | Excluded (>50% missing) |
| Interleukin-15 receptor subunit alpha (IL-15RA)                               | Q13261     | Inflammation      |                         |
| Interleukin-17A (IL-17A)                                                      | Q16552     | Inflammation      |                         |
| Interleukin-17C (IL-17C)                                                      | Q9P0M4     | Inflammation      |                         |
| Interleukin-18 (IL-18)                                                        | Q14116     | Inflammation      |                         |
| Interleukin-18 receptor 1 (IL-18R1)                                           | Q13478     | Inflammation      |                         |
| Interleukin-2 (IL-2)                                                          | P60568     | Inflammation      | Excluded (>50% missing) |
| Interleukin-2 receptor subunit beta (IL-2RB)                                  | P14784     | Inflammation      | Excluded (>50% missing) |
| Interleukin-20 (IL-20)                                                        | Q9NYY1     | Inflammation      | Excluded (>50% missing) |
| Interleukin-20 receptor subunit alpha (IL-20RA)                               | Q9UHF4     | Inflammation      | Excluded (>50% missing) |
| Interleukin-22 receptor subunit alpha-1 (IL-22 RA1)                           | Q8N6P7     | Inflammation      | Excluded (>50% missing) |
| Interleukin-24 (IL-24)                                                        | Q13007     | Inflammation      | Excluded (>50% missing) |
| Interleukin-33 (IL-33)                                                        | O95760     | Inflammation      | Excluded (>50% missing) |
| Interleukin-4 (IL-4)                                                          | P05112     | Inflammation      | Excluded (>50% missing) |
| Interleukin-5 (IL-5)                                                          | P05113     | Inflammation      | Excluded (>50% missing) |
| Interleukin-7 (IL-7)                                                          | P13232     | Inflammation      |                         |
| Interleukin-8 (IL-8)                                                          | P10145     | Inflammation      |                         |
| Latency-associated peptide transforming growth factor beta 1 (LAP TGF-beta-1) | P01137     | Inflammation      |                         |
| Leukemia inhibitory factor (LIF)                                              | P15018     | Inflammation      | Excluded (>50% missing) |
| Leukemia inhibitory factor receptor (LIF-R)                                   | P42702     | Inflammation      |                         |
| Macrophage colony-stimulating factor 1 (CSF-1)                                | P09603     | Inflammation      |                         |
| Macrophage inflammatory protein 1-alpha (MIP-1 alpha )                        | P10147     | Inflammation      | Excluded (>50% missing) |
| Matrix metalloproteinase-1 (MMP-1)                                            | P03956     | Inflammation      |                         |
| Matrix metalloproteinase-10 (MMP-10)                                          | P09238     | Inflammation      |                         |
| Monocyte chemoattractant protein 1 (MCP-1)                                    | P13500     | Inflammation      |                         |
| Monocyte chemoattractant protein 2 (MCP-2)                                    | P80075     | Inflammation      |                         |
| Monocyte chemoattractant protein 3 (MCP-3)                                    | P80098     | Inflammation      |                         |
| Monocyte chemoattractant protein 4 (MCP-4)                                    | Q99616     | Inflammation      |                         |
| Natural killer cell receptor 2B4 (CD244)                                      | Q9BZW8     | Inflammation      |                         |
| Neurotrophin-3 (NT-3)                                                         | P20783     | Inflammation      |                         |
| Neurturin (NRTN)                                                              | Q99748     | Inflammation      | Excluded (>50% missing) |

Table continues on next page

Table S1. Cont.

| Protein                                                                        | UniProt No | Immunoassay panel | Comment                 |
|--------------------------------------------------------------------------------|------------|-------------------|-------------------------|
| Oncostatin-M (OSM)                                                             | P13725     | Inflammation      |                         |
| Osteoprotegerin (OPG)                                                          | O00300     | Inflammation      |                         |
| Programmed cell death 1 ligand 1 (PD-L1)                                       | Q9NZQ7     | Inflammation      |                         |
| Protein S100-A12 (EN-RAGE)                                                     | P80511     | Inflammation      |                         |
| Signaling lymphocytic activation molecule (SLAMF1)                             | Q13291     | Inflammation      |                         |
| SIR2-like protein 2 (SIRT2)                                                    | Q8IXJ6     | Inflammation      |                         |
| STAM-binding protein (STAMPB)                                                  | O95630     | Inflammation      |                         |
| Sulfotransferase 1A1 (ST1A1)                                                   | P50225     | Inflammation      |                         |
| T cell surface glycoprotein CD6 isoform (CD6)                                  | Q8WWJ7     | Inflammation      |                         |
| T-cell surface glycoprotein CD5 (CD5)                                          | P06127     | Inflammation      |                         |
| Thymic stromal lymphopoietin (TSLP)                                            | Q969D9     | Inflammation      | Excluded (>50% missing) |
| TNF-beta (TNFB)                                                                | P01374     | Inflammation      |                         |
| TNF-related activation-induced cytokine (TRANCE)                               | O14788     | Inflammation      |                         |
| Tumor necrosis factor (Ligand) superfamily, member 12 (TWEAK)                  | Q4ACW9     | Inflammation      |                         |
| Tumor necrosis factor (TNF)                                                    | P01375     | Inflammation      | Excluded (>50% missing) |
| Tumor necrosis factor ligand superfamily member 14 (TNFSF14)                   | O43557     | Inflammation      |                         |
| Tumor necrosis factor receptor superfamily member 9 (TNFRSF9)                  | Q07011     | Inflammation      |                         |
| Urokinase-type plasminogen activator (uPA)                                     | P00749     | Inflammation      |                         |
| 5'-nucleotidase (5'-NT)                                                        | P21589     | Oncology II       |                         |
| A disintegrin and metalloproteinase with thrombospondin motifs 15 (ADAM-TS 15) | Q8TE58     | Oncology II       |                         |
| A/B (MIC-A/B)                                                                  | Q29980     | Oncology II       |                         |
| ALpha-taxilin (TXLNA)                                                          | P40222     | Oncology II       |                         |
| AmPhiregulin (AR)                                                              | P15514     | Oncology II       |                         |
| Annexin A1 (ANXA1)                                                             | P04083     | Oncology II       |                         |
| Carbonic anhydrase 9 (CA9)                                                     | Q16790     | Oncology II       |                         |
| Carboxypeptidase E (CPE)                                                       | P16870     | Oncology II       |                         |
| Carcinoembryonic antigen-related celladhesion molecule 1 (CEACAM1)             | P13688     | Oncology II       |                         |
| Carcinoembryonic antigen-related celladhesion molecule 5 (CEACAM5)             | P06731     | Oncology II       |                         |
| Cathepsin L2 (CTSV)                                                            | O60911     | Oncology II       |                         |
| CD160 antigen (CD160)                                                          | O95971     | Oncology II       |                         |
| CD27 antigen (CD27)                                                            | P26842     | Oncology II       |                         |
| CD48 antigen (CD48)                                                            | P09326     | Oncology II       |                         |
| CD70 antigen (CD70)                                                            | P32970     | Oncology II       |                         |
| Cornulin (CRNN)                                                                | Q9UBG3     | Oncology II       |                         |
| C-type lectin domain family 4 member K(CD207)                                  | Q9UJ71     | Oncology II       |                         |
| C-X-C motif chemokine 13 (CXCL13)                                              | O43927     | Oncology II       |                         |
| Cyclin-dependent kinase inhibitor 1 (CDKN1A)                                   | P38936     | Oncology II       | Excluded (>50% missing) |

Table continues on next page



Table S1. Cont.

| Protein                                                             | UniProt No | Immunoassay panel | Comment                 |
|---------------------------------------------------------------------|------------|-------------------|-------------------------|
| Delta-like protein 1 (DLL1)                                         | O00548     | Oncology II       |                         |
| Disintegrin and metalloproteinase domain-containing protein (ADAM8) | P78325     | Oncology II       |                         |
| Endothelial cell-specific molecule 1 (ESM-1)                        | Q9NQ30     | Oncology II       |                         |
| EPhrin type-A receptor 2 (EPH2)                                     | P29317     | Oncology II       |                         |
| FAS-associated death domain protein (FADD)                          | Q13158     | Oncology II       |                         |
| Fc receptor-like B (FCRLB)                                          | Q6BAA4     | Oncology II       |                         |
| Fibroblast growth factor-binding Protein 1 (FGF-BP1)                | Q14512     | Oncology II       |                         |
| Folate receptor alpha (FR-alpha)                                    | P15328     | Oncology II       |                         |
| Folate receptor gamma (FR-gamma)                                    | P41439     | Oncology II       |                         |
| Furin (FURIN)                                                       | P09958     | Oncology II       |                         |
| Galectin-1 (Gal-1)                                                  | P09382     | Oncology II       |                         |
| Glypican-1 (GPC1)                                                   | P35052     | Oncology II       |                         |
| Granzyme B (GZMB)                                                   | P10144     | Oncology II       |                         |
| Granzyme H (GZMH)                                                   | P20718     | Oncology II       |                         |
| ICOS ligand (ICOSLG)                                                | O75144     | Oncology II       |                         |
| Insulin-like growth factor 1 receptor (IGF1R)                       | P08069     | Oncology II       | Excluded (>50% missing) |
| Integrin alpha-V (ITGAV)                                            | P06756     | Oncology II       |                         |
| Integrin beta-5 (ITGB5)                                             | P18084     | Oncology II       |                         |
| Interferon gamma receptor 1 (IFN-gamma-R1)                          | P15260     | Oncology II       |                         |
| Kallikrein-11 (hK11)                                                | Q9UBX7     | Oncology II       |                         |
| Kallikrein-13 (KLK13)                                               | Q9UKR3     | Oncology II       |                         |
| Kallikrein-14 (hK14)                                                | Q9P0G3     | Oncology II       |                         |
| Kallikrein-8 (hK8)                                                  | O60259     | Oncology II       |                         |
| Ly6/PLAUR domain-containing Protein 3 (LYPD3)                       | O95274     | Oncology II       |                         |
| Melanoma-derived growth regulatory Protein (MIA)                    | Q16674     | Oncology II       |                         |
| Mesothelin (MSLN)                                                   | Q13421     | Oncology II       |                         |
| Methionine aminoPeptidase 2 (MetAp2)                                | P50579     | Oncology II       |                         |
| MHC class I Polypeptide-related se Quence                           | Q29983     | Oncology II       | Excluded (>50% missing) |
| Midkine (Mk)                                                        | P21741     | Oncology II       |                         |
| Mothers against decapentaplegic homolog 5 (MAD homolog 5)           | Q99717     | Oncology II       |                         |
| Mucin-16 (MUC-16)                                                   | Q8WXI7     | Oncology II       |                         |
| Nectin-4 (PVRL4)                                                    | Q96NY8     | Oncology II       |                         |
| Pancreatic prohormone (PPY)                                         | P01298     | Oncology II       |                         |
| Podocalyxin (PODXL)                                                 | O00592     | Oncology II       |                         |
| Pro-epidermal growth factor (EGF)                                   | P01133     | Oncology II       |                         |
| Protein CYR61 (CYR61)                                               | O00622     | Oncology II       |                         |
| Protein S100-A11 (S100A11)                                          | P31949     | Oncology II       |                         |

Table continues on next page

Table S1. Cont.

| Protein                                                        | UniProt No | Immunoassay panel | Comment |
|----------------------------------------------------------------|------------|-------------------|---------|
| Protein S100-A4 (S100A4)                                       | P26447     | Oncology II       |         |
| Proto-oncogene tyrosine-protein kinase receptor Ret (RET)      | P07949     | Oncology II       |         |
| Receptor tyrosineprotein kinase erbB-2(ERBB2)                  | P04626     | Oncology II       |         |
| Receptor tyrosineprotein kinase erbB-3 (ERBB3)                 | P21860     | Oncology II       |         |
| Receptor tyrosineprotein kinase erbB-4 (ERBB4)                 | Q15303     | Oncology II       |         |
| R-spondin-3 (RSPO3)                                            | Q9BXY4     | Oncology II       |         |
| Secretory carrier-associated membraneprotein 3 (SCAMP3)        | O14828     | Oncology II       |         |
| Seizure 6-like protein (SEZ6L)                                 | Q9BYH1     | Oncology II       |         |
| SPARC (SPARC)                                                  | P09486     | Oncology II       |         |
| Syndecan-1 (SYND1)                                             | P18827     | Oncology II       |         |
| T-cell leukemia / lymphoma Protein 1A (TCL1A)                  | P56279     | Oncology II       |         |
| TGF-beta receptor type-2 (TGFR-2)                              | P37173     | Oncology II       |         |
| Tissue factor pathway inhibitor 2 (TFP1-2)                     | P48307     | Oncology II       |         |
| T-lymphocyte surface antigen Ly-9 (LY9)                        | Q9HBG7     | Oncology II       |         |
| Toll-like receptor 3 (TLR3)                                    | O15455     | Oncology II       |         |
| Transmembrane glycoprotein NMB (GPNMB)                         | Q14956     | Oncology II       |         |
| Tumor necrosis factor ligand superfamilymember 13 (TNFSF13)    | O75888     | Oncology II       |         |
| Tumor necrosis factor ligand superfamilymember 6 (FASLG)       | P48023     | Oncology II       |         |
| Tumor necrosis factor receptor superfamilymember 19 (TNFRSF19) | Q9NS68     | Oncology II       |         |
| Tumor necrosis factor receptor superfamilymember 4 (TNFRSF4)   | P43489     | Oncology II       |         |
| Tumor necrosis factor receptor superfamilymember 6B (TNFRSF6B) | O95407     | Oncology II       |         |
| Tyrosineprotein kinase ABL1 (ABL1)                             | P00519     | Oncology II       |         |
| Tyrosineprotein kinase Lyn (LYN)                               | P07948     | Oncology II       |         |
| Vascular endothelial growth factor receptor 2 (VEGFR-2)        | P35968     | Oncology II       |         |
| Vascular endothelial growth factor receptor 3 (VEGFR-3)        | P35916     | Oncology II       |         |
| VEGF-co regulated chemokine 1 (CXL17)                          | Q6UXB2     | Oncology II       |         |
| Vimentin (VIM)                                                 | P08670     | Oncology II       |         |
| WAP four-disulfide core domain protein 2 (WFDC2)               | Q14508     | Oncology II       |         |
| Wnt inhibitory factor 1 (WIF-1)                                | Q9Y5W5     | Oncology II       |         |
| WNT1-inducible-signaling pathway protein 1 (WISP-1)            | O95388     | Oncology II       |         |
| Xaa-pro aminopeptidase 2 (XPNPEP2)                             | O43895     | Oncology II       |         |
